# Supplementary material for: Barriers and Mitigating Strategies to Healthcare Access in Indigenous Communities of Canada: A Narrative Review
Source: MDPI journal article supplement (doi:10.3390/healthcare8020112), 2020-04-26
Supplement: s1 [file s1]

## Supplementary Material

**Table 1.** Search words used in search engines and databases.

| Search Engines / Databases | Search Words                                                                                                                                                                                                                                                                                                                                                                                                                                       |
|----------------------------|----------------------------------------------------------------------------------------------------------------------------------------------------------------------------------------------------------------------------------------------------------------------------------------------------------------------------------------------------------------------------------------------------------------------------------------------------|
| EMBASE                     | <ul style="list-style-type: none"> <li>• Health service* accessibility</li> <li>• Healthcare disparit*</li> <li>• Barrier* OR facilitator OR approachability OR appropriate* accessibility OR accessible OR availability OR affordability</li> <li>• Social determinants of health OR socioeconomic factors OR social support OR culturally appropriate OR community participation OR financial support OR financial hardship</li> </ul>           |
| Google                     | <ul style="list-style-type: none"> <li>• Health care access</li> <li>• Health care need</li> <li>• Health services needs and demand</li> <li>• Health care availability</li> <li>• Delivery of health care</li> <li>• Health care distribution</li> <li>• Quality of healthcare</li> </ul>                                                                                                                                                         |
| Google scholar             | <ul style="list-style-type: none"> <li>• Health service* accessibility</li> <li>• Healthcare disparit*</li> <li>• Barrier* OR facilitator OR approachability OR appropriate* accessibility OR accessible OR availability OR affordability</li> <li>• Social determinants of health OR socioeconomic factors OR social support OR culturally appropriate OR community participation OR financial support OR financial hardship</li> </ul>           |
| iPortal                    | <ul style="list-style-type: none"> <li>• Health service* accessibility</li> <li>• Healthcare disparit*</li> <li>• Barrier* OR facilitator OR approachability OR appropriate* accessibility OR accessible OR availability OR affordability</li> <li>• Social determinants of health OR socioeconomic factors OR social support OR culturally appropriate OR community participation OR financial support OR financial hardship</li> </ul>           |
| MEDLINE                    | <ul style="list-style-type: none"> <li>• ("Improve*" OR "Increase*") ("health care access*" OR "health access*") for ("indigenous*" OR "aboriginal*" OR "First Nation*" OR "Inuit*" OR "Metis")</li> <li>• (Improv* OR Increas* OR Enhanc* OR Promot*) AND ("health care access*" OR "health access*" OR "health") AND (indigenous OR native OR aboriginal OR indians OR first nations) AND (in Canada) AND ("strateg*" OR "solution*")</li> </ul> |
| ProQuest                   | <ul style="list-style-type: none"> <li>• Health service* accessibility</li> <li>• Healthcare disparit*</li> <li>• Barrier* OR facilitator OR approachability OR appropriate* accessibility OR accessible OR availability OR affordability</li> <li>• Social determinants of health OR socioeconomic factors OR social support OR culturally appropriate OR community participation OR financial support OR financial hardship</li> </ul>           |
| PubMed                     | <ul style="list-style-type: none"> <li>• ("Improve*" OR "Increase*") ("health care access*" OR "health access*") for ("indigenous*" OR "aboriginal*" OR "First Nation*" OR "Inuit*" OR "Metis")</li> <li>• (Improv* OR Increas* OR Enhanc* OR Promot*) AND ("health care access*" OR "health access*" OR "health") AND (indigenous OR native OR aboriginal OR indians OR first nations) AND (in Canada) AND ("strateg*" OR "solution*")</li> </ul> |

**Table 2.** Articles included in the review.

| <b>Publication</b>                                              | <b>Theme</b>                               | <b>Sub-topic</b>                                                   | <b>Mitigation Strategies</b>                          |
|-----------------------------------------------------------------|--------------------------------------------|--------------------------------------------------------------------|-------------------------------------------------------|
| Beatty, B.B and Berdahl, L., 2011. [64]                         | Intermediate Barriers                      | Employment and income                                              |                                                       |
| Beckett, M., et al., 2018. [86]                                 | Intermediate Barriers                      |                                                                    | Health education systems; Racism and social exclusion |
| Browne, A.J. et al., 2016. [58]                                 | Proximal Barriers                          |                                                                    | Insufficient numbers or retention of qualified HCP    |
| Cameron, B.L. et al., 2014. [34]                                | Proximal and Distal Barriers               | Education attainment; Negative bias; Racism and social exclusion   | Insufficient numbers or retention of qualified HCP    |
| Fridkin, A.J., 2012. [78]                                       | Distal Barriers                            | Colonialism                                                        |                                                       |
| Government of Canada, 2018. Budget plan 2018 [10]               | Proximal, Intermediate and Distal Barriers |                                                                    | Geography; education and employment; colonialism      |
| Haddad, P.S. et al., 2012 [84]                                  | Distal Barriers                            | Racism and social exclusion                                        |                                                       |
| Indigenous and Northern Affairs Canada, 2017. [37]              | Proximal Barriers                          |                                                                    | Education attainment                                  |
| Institute for Circumpolar Health Research, 2016. [79]           | Distal Barriers                            | Colonialism                                                        |                                                       |
| Interior Health Authority, 2019. [42]                           | Proximal Barriers                          |                                                                    | Education attainment                                  |
| Inuit Tapiriit Kanatami, 2014. [21]                             | Proximal Barriers                          | Geography                                                          |                                                       |
| Island Health, 2016. [25]                                       | Distal Barriers                            |                                                                    | Racism and social exclusion                           |
| Kulhawy-Wibe, S. et al. 2018 [20]                               | Proximal Barriers                          | Geography                                                          |                                                       |
| Lavoie, J.G., 2013. [80]                                        | Distal Barriers                            |                                                                    | Colonialism                                           |
| Lewis, M. and Myhra, L.L., 2017. [30]                           | Intermediate and Distal Barriers           | Education attainment; Employment and income                        | Colonialism; Racism and social exclusion              |
| Mathu-Muju, K.R. et al., 2017. [53]                             | Proximal Barriers                          | Insufficient numbers or retention of qualified HCP                 |                                                       |
| Matthews, R., 2017. [71]                                        | Intermediate and Distal Barriers           | Health education systems; Colonialism; Racism and social exclusion |                                                       |
| McCalman, J. et al., 2019. [51]                                 | Proximal Barriers                          | Insufficient numbers or retention of qualified HCP                 |                                                       |
| McDonnell, L. et al., 2019. [49]                                | Proximal Barriers                          | Insufficient numbers or retention of qualified HCP                 |                                                       |
| Misfeldt, R. et. al., 2013. [54]                                | Proximal Barriers                          |                                                                    | Insufficient numbers or retention of qualified HCP    |
| Nader et al., 2017. [3]                                         | Proximal Barriers                          | Negative Bias                                                      |                                                       |
| National Collaborating Centre for Aboriginal Health, 2017. [61] | Intermediate Barriers                      | Employment and income                                              |                                                       |
| Nelson, E., 2017. [19]                                          | Proximal Barriers                          | Geography                                                          |                                                       |

|                                                                |                                                             |                                                               |                                                                |
|----------------------------------------------------------------|-------------------------------------------------------------|---------------------------------------------------------------|----------------------------------------------------------------|
| O'Neil, J., et al., 2016 [83]                                  | Distal Barriers                                             |                                                               | Colonialism                                                    |
| Oosterveer, T.M., and Young, T.K., 2015. [22]                  | Proximal Barriers                                           | Geography; Insufficient numbers or retention of qualified HCP |                                                                |
| Reading, C.L., and Wien, F., 2009. [18]                        | Social Determinants of Indigenous People's Health Framework |                                                               |                                                                |
| Restoule, B.M. et. al., 2016. [45]                             | Proximal and Distal Barriers                                |                                                               | Negative bias; Colonialism                                     |
| Rowan, M. et al., 2014. [85]                                   | Distal Barriers                                             | Racism and social exclusion                                   |                                                                |
| Saskatchewan Health Authority, 2010. [35]                      | Proximal and Distal Barriers                                | Education attainment                                          | Education attainment; Colonialism; Racism and social exclusion |
| Tang, S.Y. et. al., 2015. [44]                                 | Proximal Barriers                                           | Negative Bias                                                 |                                                                |
| The National Indigenous Economic Development Board, 2019. [77] | Distal Barriers                                             | Colonialism                                                   |                                                                |
| Toronto Indigenous Health Advisory Circle, 2016. [81]          | Distal Barriers                                             |                                                               | Colonialism                                                    |
| Toulouse, J., 2016. [74]                                       | Intermediate Barriers                                       |                                                               | Health education systems                                       |
| Wilk, P. et al., 2017. [43]                                    | Proximal Barriers                                           | Negative bias                                                 |                                                                |
| Wylie, L. and McConkey, S., 2018. [4]                          | Proximal Barriers                                           | Negative Bias                                                 |                                                                |
| Zeran, V., 2016. [75]                                          | Intermediate Barriers                                       |                                                               | Health education systems                                       |
